# Supplementary material for: Super-strong CNT composite yarn with tight CNT packing via a compress-stretch process
Source: Royal Society of Chemistry journal article supplement (doi:10.1039/d2nr00874b), 2022-01-01
Supplement: d2nr00874b1.pdf [file d2nr00874b1.pdf]

## Support information

### Super-strong CNT composite yarn with tight CNT packing via compress-stretch process

**Xiaoxiao Wei<sup>a,b</sup>, Jilong Wang, Huan Ma<sup>a,b</sup>, Fariyal Islam Farha<sup>a,b</sup>, Siyi Bi<sup>b</sup>, Qin Zhang,<sup>b</sup> Fujun Xu<sup>\*a,b</sup>**

a. Key Laboratory of Textile Science & Technology (Donghua University), Ministry of Education, Shanghai 201620, P. R. China

b. College of textiles, Donghua University, Shanghai 201620, P. R. China

\*Corresponding authors' Email: fjxu@dhu.edu.cn

CNT film was produced using the chemical vapor deposition (CVD) method. The ferrocene (0.4 wt%) and thiophene (0.8 wt%) were dissolved in ethanol (98.8 wt%), the solution was injected into the tubing (1280 °C) at a feeding rate of 0.15ml/min, and the gaseous mixture of Ar/H<sub>2</sub> (volume ratio 1:1) at a speed of 4000 sccm were injected to a furnace. Thus, the entangled CNT networks were formed, which could be carried out by the gas flow. Finally, CNTs were collected by a roller and densified by ethanol forming a CNT film [1].

Since CNTs can be dispersed uniformly with a relatively low volume fraction (~0.05-0.1) due to agglomeration characteristics of CNTs [2]. However, CNT Y can be arranged uniformly in the polymer at a higher volume fraction (~0.4-0.6, CNT yarn tight packing) because of the higher volume fraction of CNTs in the CNT yarn [3]. The CNT/PVA Y in this paper shows a high volume fraction ( $V_f = 0.38 \pm 0.02$ ).

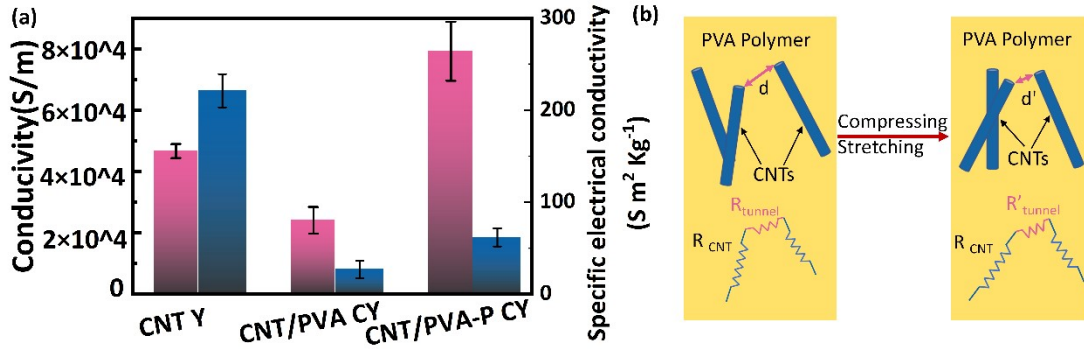

Fig.S1 (a) Electrical conductivity (left y-axis) and specific electrical conductivity (right y-axis). (b) tunneling effect among CNTs in the nanocomposites; (b) Schematic illustration of the possible tunneling resistance and contact resistance in CNT/PVA composites yarn under compressing and stretching.

Fig.S1 shows the conductivity and specific electrical conductivity of the yarn. The electrical conductivity of pristine CNTY is 46657 S/m. By introducing the conductor-insulator PVA polymer into CNTY, there is a noticeable decrease in the electrical conductivity (24075 S/m) of CNT/PVA CY due to the insulation characteristic of PVA polymer. Strikingly, the electrical conductivity of CNT/PVA-P CY soars to 79237 S/m, which is 329% higher than that of a CNT/PVA CY. It is considered that the electron tunnel effect within the composites yarn is the primary electron conduction mechanism. Thus, the increase of electrical conductivity in CNT/PVA composites yarn before and after passing through dies can be explained based on electron tunneling resistance, as shown in Fig.S1b. The formula is as follows:

$$R_{t u n n e l} = \frac{V}{A} \frac{h^2 d}{A e^2 \sqrt{2} m} \lambda \left( \frac{4 \pi}{h} \sqrt{\frac{d}{2} m} \right) \lambda \quad (1)$$

where V is the electrical potential difference; h is Planck's constant; d is the distance between CNTs; A is the cross-sectional area of the tunnel (the cross-sectional area of

CNT is approximately used here);  $J$  is the tunneling current density;  $e$  is the quantum of electricity;  $m$  is the mass of electron; and  $\lambda$  is the height of the barrier. According to Eq. (1), the exponential function illustrates that a significant decrease of  $d$  causes a considerable reduction of tunneling resistance. Therefore, the CNT/PVA-P composite yarn exhibits increased conductivity by compressing and stretching due to a decreasing tunneling gap and the reduction of  $R_{\text{tunnel}}$ .

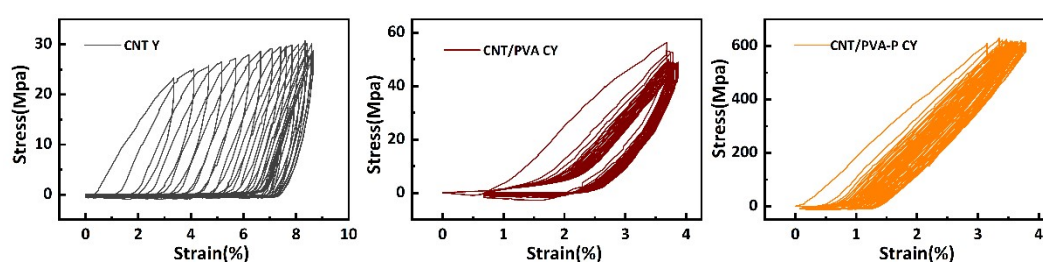

Fig.S2 Typical stress changes of (a) CNT Y (b) CNT/PVA CY (c) CNT/PVA-P CY during 22 stretching cycles as a function of the applied tensile strain (3%).

## References

- [1] Aouraghe MA, Xu F, Liu X, Qiu Y. Flexible, quickly responsive and highly efficient E-heating carbon nanotube film. *Compos Sci Technol.* 2019; 183:107824.
- [2] J.N. Coleman, U. Khan, W.J. Blau, Y.K. Gun'ko, Small but strong: A review of the mechanical properties of carbon nanotube-polymer composites, *Carbon* 44(9) (2006) 1624-1652.
- [3] X. Sui, I. Greenfeld, H. Cohen, X. Zhang, Q. Li, H.D. Wagner, Multilevel composite using carbon nanotube fibers (CNTF), *Composites Science and Technology* 137 (2016) 35-43.
